# Supplementary material for: Crystal Structure of Allantoinase from Escherichia coli BL21: A Molecular Insight into a Role of the Active Site Loops in Catalysis
Source: MDPI journal article supplement (doi:10.3390/molecules28020827), 2023-01-13
Supplement: s1 [file s1]

Supplementary Materials

# Crystal Structure of Allantoinase from *Escherichia coli* BL21: A Molecular Insight into a Role of the Active Site Loops in Catalysis

Yen-Hua Huang <sup>1</sup>, Po-Chun Yang <sup>1</sup>, En-Shyh Lin <sup>2</sup>, Ya-Yeh Ho <sup>1</sup>, Wei-Feng Peng <sup>1,3,4</sup>, Hsin-Pin Lu <sup>1</sup>, Chien-Chih Huang <sup>1</sup> and Cheng-Yang Huang <sup>1,5,\*</sup>

<sup>1</sup> Department of Biomedical Sciences, Chung Shan Medical University, Taichung City 402, Taiwan

<sup>2</sup> Department of Beauty Science, National Taichung University of Science and Technology, Taichung City 403, Taiwan

<sup>3</sup> Department of Medicine, College of Medicine, Chung Shan Medical University, Taichung City 402, Taiwan

<sup>4</sup> Department of Pediatrics, National Taiwan University Children's Hospital, Taipei 100, Taiwan

<sup>5</sup> Department of Medical Research, Chung Shan Medical University Hospital, Taichung City 402, Taiwan

\* Correspondence: cyhuang@csmu.edu.tw

Supplementary Figure

## EcALLase-BL21

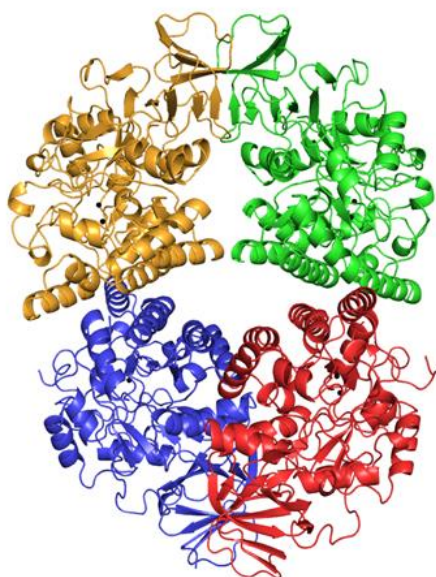

## BsHYDase

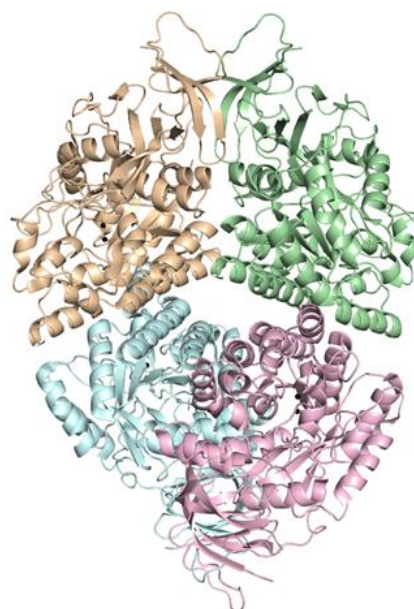

**Figure S1.** Structural comparison of EcALLase-BL21 and BsHYDase. Ribbon diagrams of EcALLase-BL21 and BsHYDase tetramers. The monomers are colored differently. Two zinc ions in the active site are presented as black spheres. The structure of these two cyclic amidohydrolases has a classic TIM barrel fold and similar active site. However, their substrate specificities do not overlap.
